# Supplementary material for: Probing the electronic and mechanistic roles of the μ4-sulfur atom in a synthetic CuZ model system
Source: Royal Society of Chemistry journal article supplement (doi:10.1039/c9sc06251c), 2020-01-01
Supplement: c9sc06251c2.pdf [file c9sc06251c2.pdf]

The diagram illustrates a photocatalytic cycle for nitrogen fixation. A microorganism, represented by an orange bean-like shape with red wavy lines (flagella) and a blue internal structure, is shown on the left. A red laser beam is directed at a molecule of  $\text{N}_2\text{OR}$  (nitrogenase reductase) located near the microorganism. This molecule is shown in a transition state, with a red arrow indicating the movement of electrons. The cycle then proceeds to the right, where a molecule of  $\text{N}_2\text{O}$  (nitrous oxide) is shown. A yellow arrow indicates the flow of electrons from the  $\text{N}_2\text{OR}$  molecule to the  $\text{N}_2\text{O}$  molecule. Finally, the cycle completes by producing  $\text{H}_2\text{O}$  (water) and  $\text{N}_2$  (nitrogen gas), which are shown as separate molecules on the right.

**Many bacteria can metabolize  $\text{N}_2\text{O}$  with an enzyme called nitrous oxide reductase ( $\text{N}_2\text{OR}$ )**

## Details of N<sub>2</sub>O reduction by the N<sub>2</sub>OR enzyme active site are unclear

# Synthetic CuZ model cluster for computationally modeling reaction mechanism and measuring electron distribution spectroscopically

# Cooperative activation of $\text{N}_2\text{O}$ across a Cu/S cluster edge

**Knowing the chemical details of  $N_2OR$  has the potential to give rise to agricultural technologies that enhance the activity of natural  $N_2O$ -fixing bacteria**
